# Supplementary material for: Electrocardiographic Characteristics and Their Correlation with Echocardiographic Alterations in Fabry Disease
Source: MDPI journal article supplement (doi:10.3390/jcdd9010011), 2022-01-03
Supplement: s1 [file s1]

**Table S1.** Electrocardiographic characteristics of FD patients in comparison to echocardiographic findings. ECG parameters assessed are listed in the first column. Comparison is made between FD patients with increased LV wall thickness and normal LV wall thickness; FD patients with impaired GLS vs normal GLS; and between FD with impaired basal LS and normal basal LS.

|                               | FD Patients with Increased vs. Normal LV Wall Thickness |                                 |                | FD Patients with Impaired GLS (Worse Than -18.0%) Compared to Normal GLS |                   |                | FD Patients with Impaired Basal LS (Worse Than -18.1%) Compared to Normal Basal LS |                        |                |
|-------------------------------|---------------------------------------------------------|---------------------------------|----------------|--------------------------------------------------------------------------|-------------------|----------------|------------------------------------------------------------------------------------|------------------------|----------------|
|                               | Increased LV Wall Thickness [n=27]                      | Normal LV Wall Thickness [n=18] | p-Value        | Impaired GLS [n=28]                                                      | Normal GLS [n=16] | p-Value        | Impaired Basal LS [n=34]                                                           | Normal Basal LS [n=10] | p-Value        |
| Age (yrs)                     | 44                                                      | 38                              | 0.060          | 47                                                                       | 35                | <b>0.001 †</b> | 45                                                                                 | 34                     | <b>0.007 †</b> |
| Corrected PQ Interval (ms)    | 156                                                     | 141                             | 0.328          | 157                                                                      | 141               | 0.327          | 156                                                                                | 133                    | 0.249          |
| Corrected PWD (ms)            | 96                                                      | 85                              | 0.328          | 94                                                                       | 89                | 0.960          | 95                                                                                 | 82                     | 0.356          |
| QRS duration (ms)             | 101                                                     | 88                              | <b>0.044 †</b> | 99                                                                       | 93                | 0.700          | 98                                                                                 | 90                     | 0.578          |
| R wave amplitude lead I (mV)  | 9.9                                                     | 5.4                             | <b>0.002 †</b> | 9.7                                                                      | 5.7               | <b>0.008 †</b> | 9.1                                                                                | 5.1                    | <b>0.014 †</b> |
| Sokolow-Lyon index (mV)       | 27.7                                                    | 21.8                            | 0.112 †        | 27.5                                                                     | 21.8              | 0.125          | 26.5                                                                               | 21.4                   | 0.235          |
| Sokolow-Lyon LVH criteria     | 13/27 (48%)                                             | 1/18 (6%)                       | <b>0.003 †</b> | 12/28 (43%)                                                              | 2/16 (13%)        | <b>0.049 †</b> | 14/34 (41%)                                                                        | 0/10                   | <b>0.018 †</b> |
| Modified Cornell Index (mV)   | 5.4                                                     | 2.3                             | <b>0.016 †</b> | 4.9                                                                      | 3.2               | 0.076          | 4.8                                                                                | 2.2                    | 0.133          |
| Modified Cornell LVH Criteria | 4/27 (15%)                                              | 0/18                            | 0.138          | 3/28 (11%)                                                               | 1/16 (6%)         | 0.620          | 4/34 (12%)                                                                         | 0/10                   | 0.559          |
| RBBB criteria                 | 4/27 (15%)                                              | 1/18 (6%)                       | 0.634          | 4/28 (14%)                                                               | 1/16 (6%)         | 0.638          | 5/34 (15%)                                                                         | 0/10                   | 0.573          |

Intervals and voltage are expressed as Mean. Categorical variables are expressed as frequency and percentage of occurrence in each group. † $p < 0.05$ . PWD = P-wave duration; LVH = Left Ventricular Hypertrophy; RBBB = Right bundle branch block; GLS = Global longitudinal strain; LS = longitudinal strain.

**Table S2.** Baseline clinical and echocardiographic characteristics of FD patients.

|                                                           |          |
|-----------------------------------------------------------|----------|
| Age (yrs)                                                 | 42       |
| ERT – no. on ERT at time of simultaneous ECG / TTE        | 7 (16%)  |
| ERT – total no. who were treated with ERT after ECG / TTE | 26 (58%) |
| Albuminuria / Chronic kidney disease                      | 13 (29%) |
| Dyslipidaemia                                             | 21 (47%) |
| Diabetes mellitus                                         | 3 (7%)   |
| Arterial hypertension                                     | 17 (38%) |
| Transient ischaemic attack / stroke                       | 8 (18%)  |
| Ischaemic heart disease                                   | 3 (7%)   |
| Echocardiographic parameters                              |          |
| Septal wall thickness (mm)                                | 12.2     |
| Posterior wall thickness (mm)                             | 11.3     |
| Average LV wall thickness (mm)                            | 11.7     |

|                                                 |       |
|-------------------------------------------------|-------|
| Left ventricular mass index (g/m <sup>2</sup> ) | 113.6 |
| LVEF (%)                                        | 61    |
| Peak E (cm/sec)                                 | 85    |
| Peak A (cm/sec)                                 | 65    |
| E/A                                             | 1.40  |
| Lateral e' (cm/sec)                             | 10    |
| Septal e' (cm/sec)                              | 8     |
| Average E/e'                                    | 10.1  |
| LAVI (mL/m <sup>2</sup> )                       | 38.7  |

**Table S3.** Comparison of clinical, echocardiographic and electrocardiographic markers of FD patients with normal LV wall thickness (cut off 13mm). and normal basal LS; normal LV wall thickness with impaired basal LS; and increased LV wall thickness and impaired basal LS.

|                                                         | Normal LV Wall Thickness (<13mm) & Normal Basal LS [n=10] [Group A] | Normal LV Wall Thickness (<13mm) & Impaired Basal LS [n=20] [Group B]           | Increased LV Wall Thickness (>13mm) & Impaired Basal LS [n=14] [Group C] |
|---------------------------------------------------------|---------------------------------------------------------------------|---------------------------------------------------------------------------------|--------------------------------------------------------------------------|
| <b>Clinical characteristics</b>                         |                                                                     |                                                                                 |                                                                          |
| Age                                                     | 34                                                                  | 41                                                                              | <b>51 +</b>                                                              |
| Males                                                   | 3 (30%)                                                             | 13 (65%)                                                                        | 10 (71%)                                                                 |
| ERT – no. on ERT at time of simultaneous ECG/TTE        | 0                                                                   | 4 (20%)                                                                         | 3 (21%)                                                                  |
| ERT – total no. who were treated with ERT after ECG/TTE | 2 (20%)                                                             | 12 (60%)                                                                        | 12 (86%)                                                                 |
| Albuminuria / Chronic kidney disease                    | 0                                                                   | 5 (25%)                                                                         | 8 (57%)                                                                  |
| Dyslipidaemia                                           | 2 (20%)                                                             | 9 (45%)                                                                         | 10 (71%)                                                                 |
| Diabetes mellitus                                       | 0                                                                   | 1 (5%)                                                                          | 2 (14%)                                                                  |
| Arterial hypertension                                   | 2 (20%)                                                             | 8 (40%)                                                                         | 9 (64%)                                                                  |
| Transient ischaemic attack / stroke                     | 1 (10%)                                                             | 4 (20%)                                                                         | 3 (21%)                                                                  |
| Ischaemic heart disease                                 | 1 (10%)                                                             | 1 (5%)                                                                          | 2 (14%)                                                                  |
| <b>Echocardiographic parameters</b>                     |                                                                     |                                                                                 |                                                                          |
| Average LV wall thickness (mm)                          | 9.1                                                                 | 10.1                                                                            | <b>16.5 +</b>                                                            |
| Left ventricular mass index (g/m <sup>2</sup> )         | 83.8                                                                | 104.6                                                                           | <b>153.5 +</b>                                                           |
| LVEF (%)                                                | 61                                                                  | 62                                                                              | 60                                                                       |
| Peak E (cm/sec)                                         | 94                                                                  | 86                                                                              | 76                                                                       |
| Peak A (cm/sec)                                         | 64                                                                  | 63                                                                              | 69                                                                       |
| E/A                                                     | 1.56                                                                | 1.51                                                                            | 1.14                                                                     |
| Lateral e' (cm/sec)                                     | 13                                                                  | 11                                                                              | <b>8 +</b>                                                               |
| Septal e' (cm/sec)                                      | 10                                                                  | <b>9 *</b>                                                                      | <b>7 +</b>                                                               |
| Average E/e'                                            | 8.82                                                                | 9.78                                                                            | <b>11.9 +</b>                                                            |
| LAVI (mL/m <sup>2</sup> )                               | 38                                                                  | 42                                                                              | 37                                                                       |
| Valvular disease                                        | Moderate MR – 1<br>Mitral prolapse – 1 (mild)<br>Mild TR – 1        | Moderate MR – 2<br>Moderate PR – 1<br>Mild MR - 2<br>Mild TR – 4<br>Mild AS – 1 | Moderate MR – 1<br>Mild MR – 1<br>Mild TR – 1                            |
| <b>ECG paramaters</b>                                   |                                                                     |                                                                                 |                                                                          |
| Corrected PQ Interval (ms)                              | 133                                                                 | 150                                                                             | 164                                                                      |
| Corrected PWD (ms)                                      | 86                                                                  | 92                                                                              | 99                                                                       |
| QRS duration (ms)                                       | 90                                                                  | 95                                                                              | 104                                                                      |
| Amplitude lead I (mV)                                   | 5.1                                                                 | 8.6 *                                                                           | 10.0                                                                     |
| Sokolow-Lyon index (mV)                                 | 21.4                                                                | 25.7                                                                            | 27.8                                                                     |

|                               |     |         |         |
|-------------------------------|-----|---------|---------|
| Sokolow-Lyon LVH criteria     | 0   | 8 (40%) | 6 (43%) |
| Modified Cornell index (mV)   | 2.2 | 4.3     | 5.6     |
| Modified Cornell LVH criteria | 0   | 2 (10%) | 2 (14%) |
| RBBB criteria                 | 0   | 3 (15%) | 2 (14%) |

---

Intervals and voltage are expressed as Means. Categorical variables are expressed as frequency and percentage of occurrence in each group. † $p < 0.05$ . PWD = P-wave duration; LVH = Left Ventricular Hypertrophy; RBBB = Right bundle branch block; GLS = Global longitudinal strain; LS = longitudinal strain; LVEF = Left ventricular ejection fraction; LAVI = Left atrial volume index; MR = mitral regurgitation; PR = pulmonary regurgitation; TR – tricuspid regurgitation; AS = aortic stenosis. \*  $p < 0.05$  for Group A vs Group B. +  $p < 0.05$  for Group B vs. Group C.
